# Supplementary material for: Multi-strategic RNA-seq analysis reveals a high-resolution transcriptional landscape in cotton
Source: PubMed Central journal article supplement (PMC6797763; doi:10.1038/s41467-019-12575-x), 2019-10-17
Supplement: 41467_2019_12575_MOESM1_ESM.pdf [file 41467_2019_12575_MOESM1_ESM.pdf]

# Multi-strategic RNA-seq analysis reveals a high-resolution transcriptional landscape in cotton

Wang *et al.*

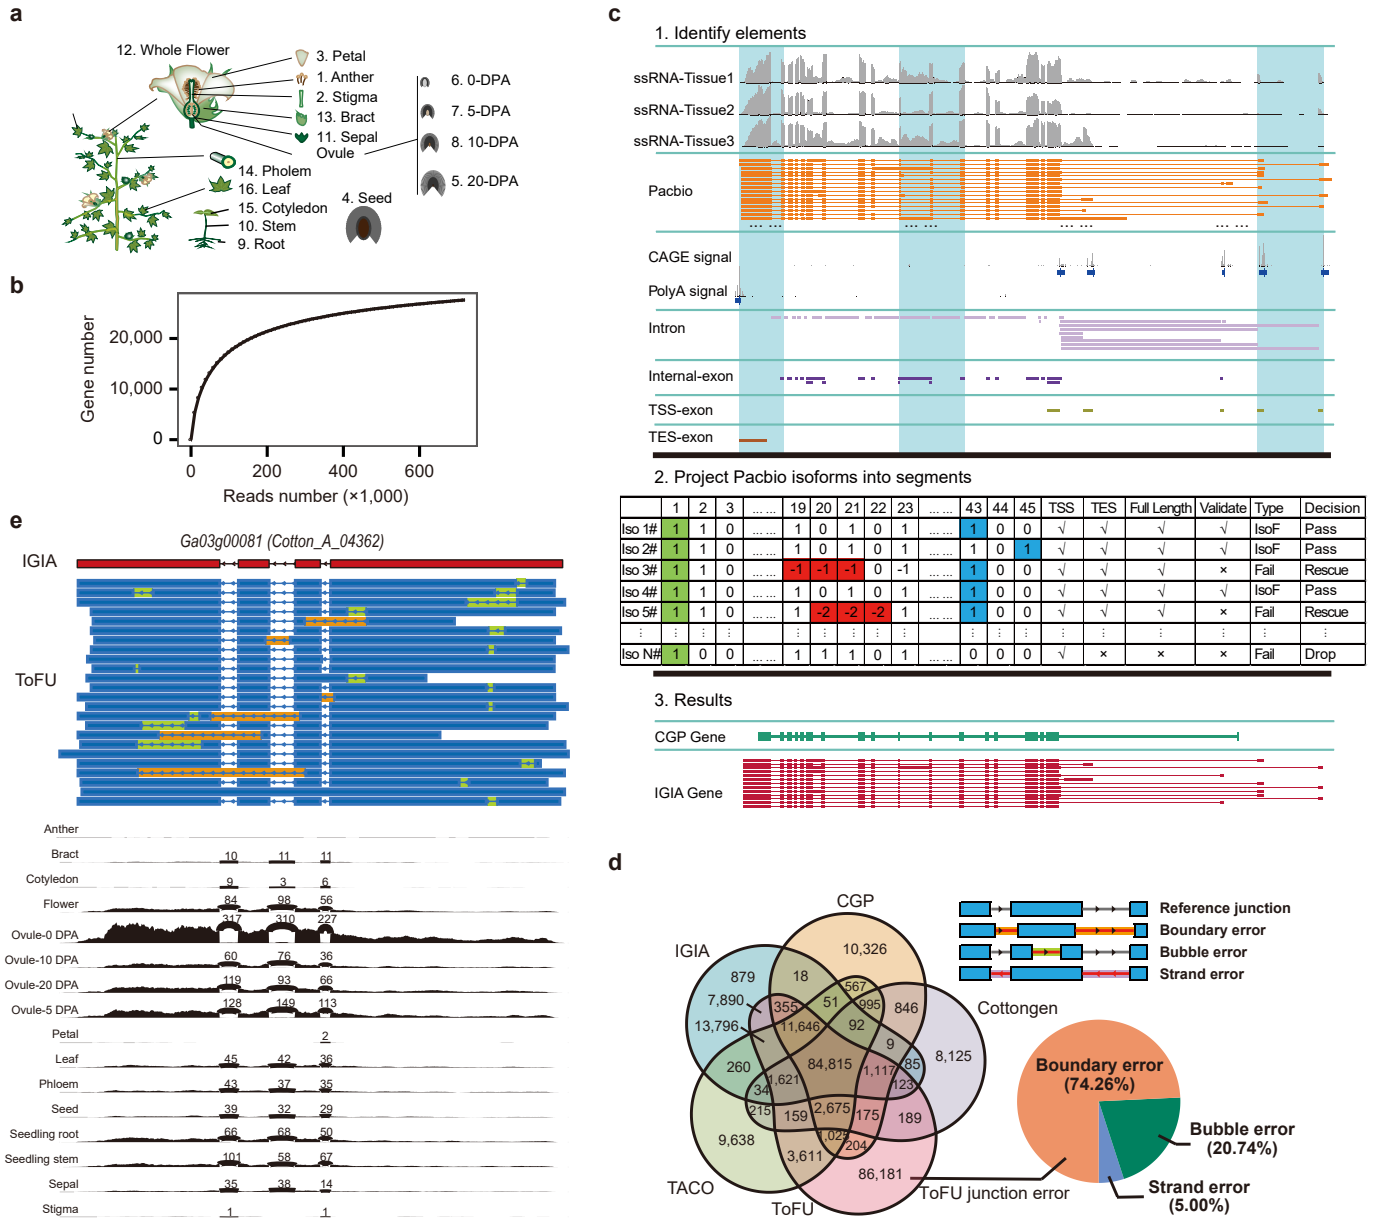

**Supplementary Figure 1. IGIA method and error correction from multi-tissue and multi-type data integration.** (a) Graphical illustration of the 16 tissue samples collected from cotton (*G. arboreum*). (b) Gene number saturation analysis for Pacbio reads. The X-axis shows the number of mapped Pacbio long reads; Y-axis shows the number of genes discovered. (c) Graphical illustration of IGIA algorithm on one gene example. (d) Comparisons of splicing junctions between IGIA, CGP, and Cottongen, and prediction using TACO and ToFU. The graphical illustration (upper right) and statistics (bottom right) of the type of junction errors from ToFU are shown. (e) The gene example showing splicing junction errors in ToFU annotation. The regions for junction errors (orange box) and bubble errors (green box) do not have any short read support from NGS ssRNA-seq across 16 tissues. The number above the junction sites represents the number of NGS reads that span splice junctions. The source data underlying Supplementary Figure 1b and 1d are provided as a Source Data file.

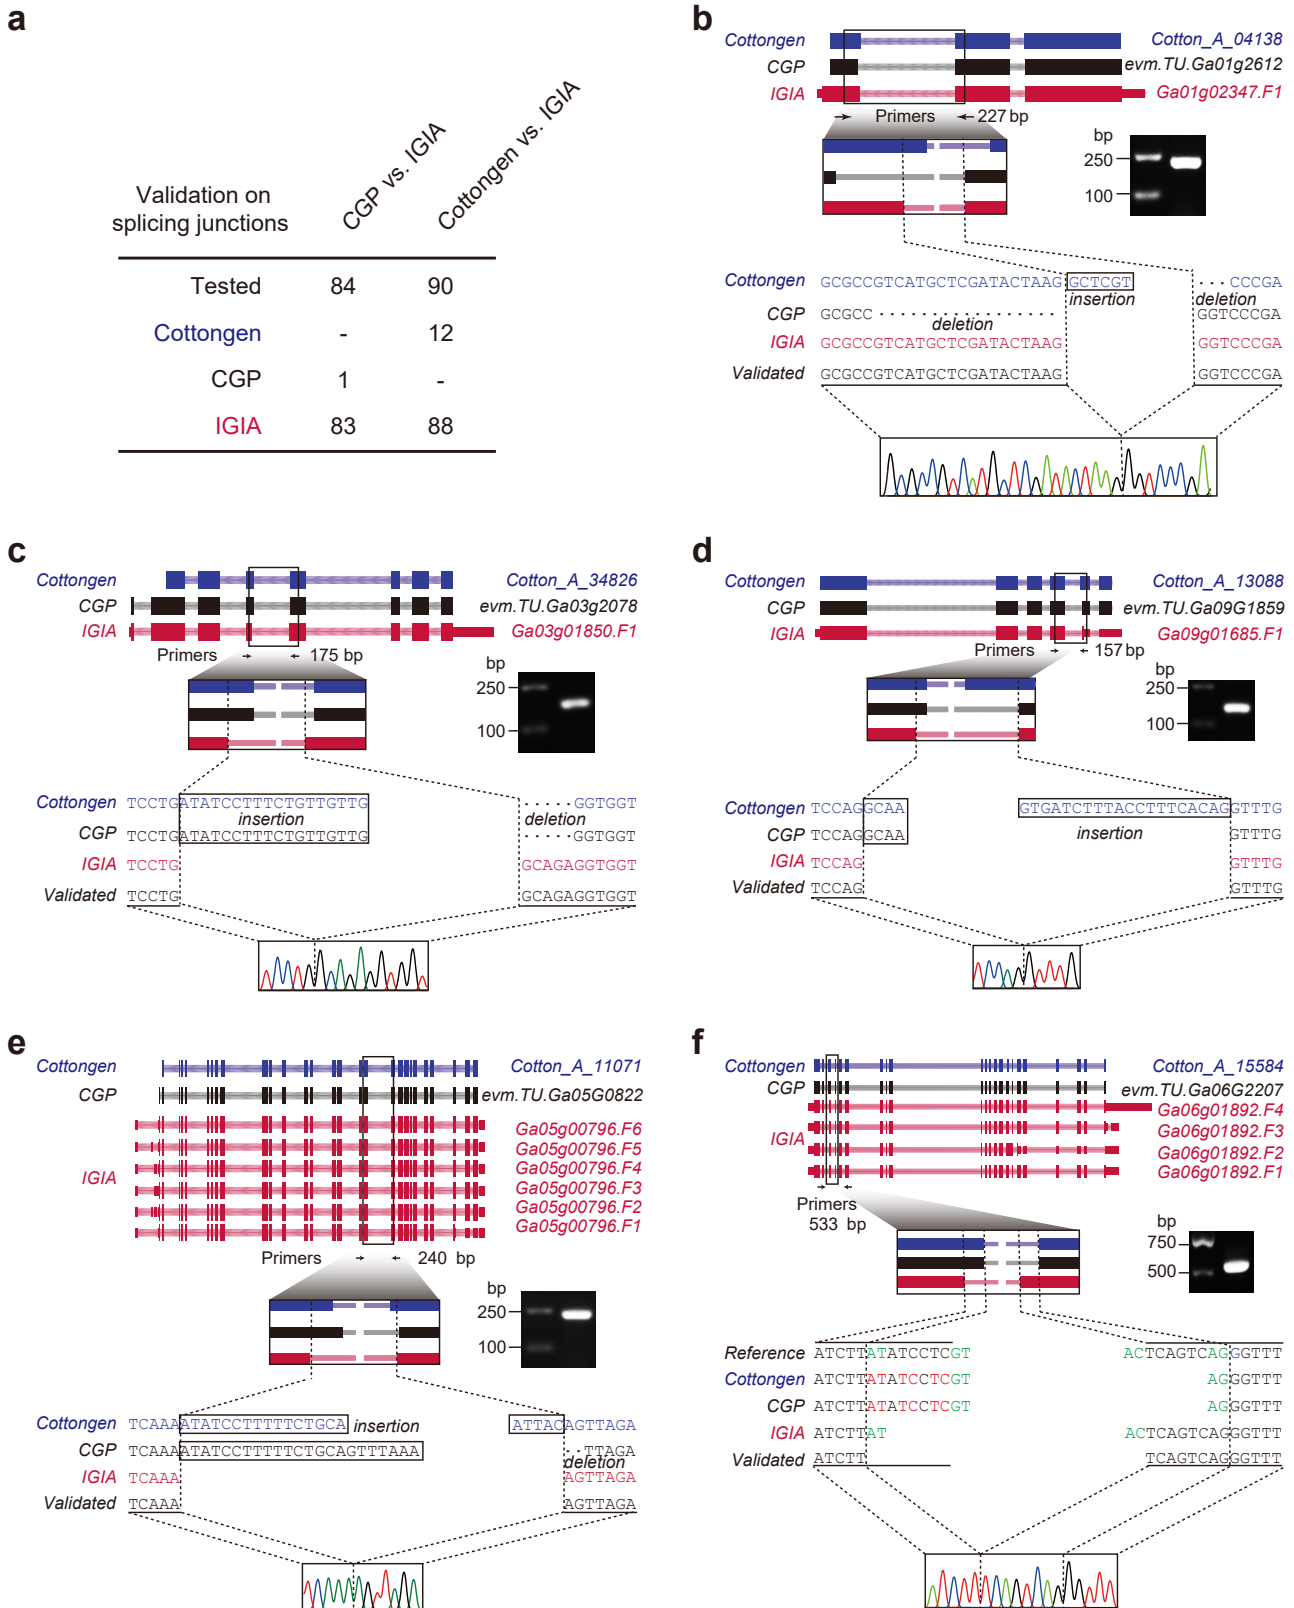

**Supplementary Figure 2. RT-PCR validation showing IGIA correctly identified the splicing junction.** (a) The experimental validation statistics for splicing junction. (b-f) Several verification results for the splicing junctions. The Sanger sequencing visualized using Chromas were compared with IGIA, CGP, and Cottongen annotations. The source data underlying Supplementary Figure 2b-f are provided as a Source Data file.

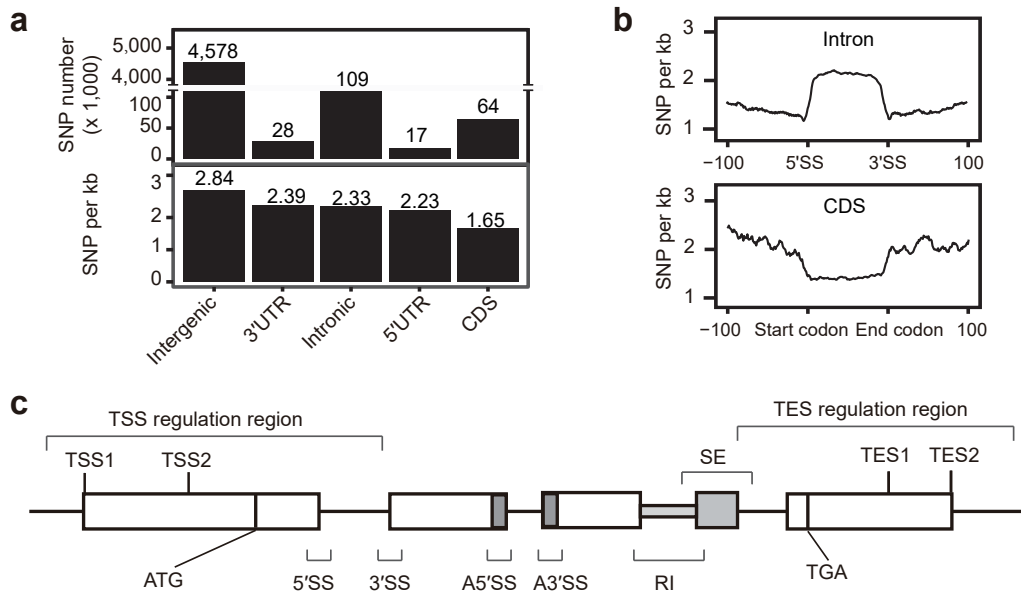

**Supplementary Figure 3. The SNP distribution in *G. arboreum* genome.** (a) The total and region length normalized SNP numbers at different genomic regions including Intergenic, 3'UTR, Intronic, 5'UTR, and CDS. (b) The meta-profiles of SNP frequency in intron (top) and CDS (bottom) regions. Their upstream and downstream 100 nt regions are also shown. (c) Graphical illustration of different regulatory regions.

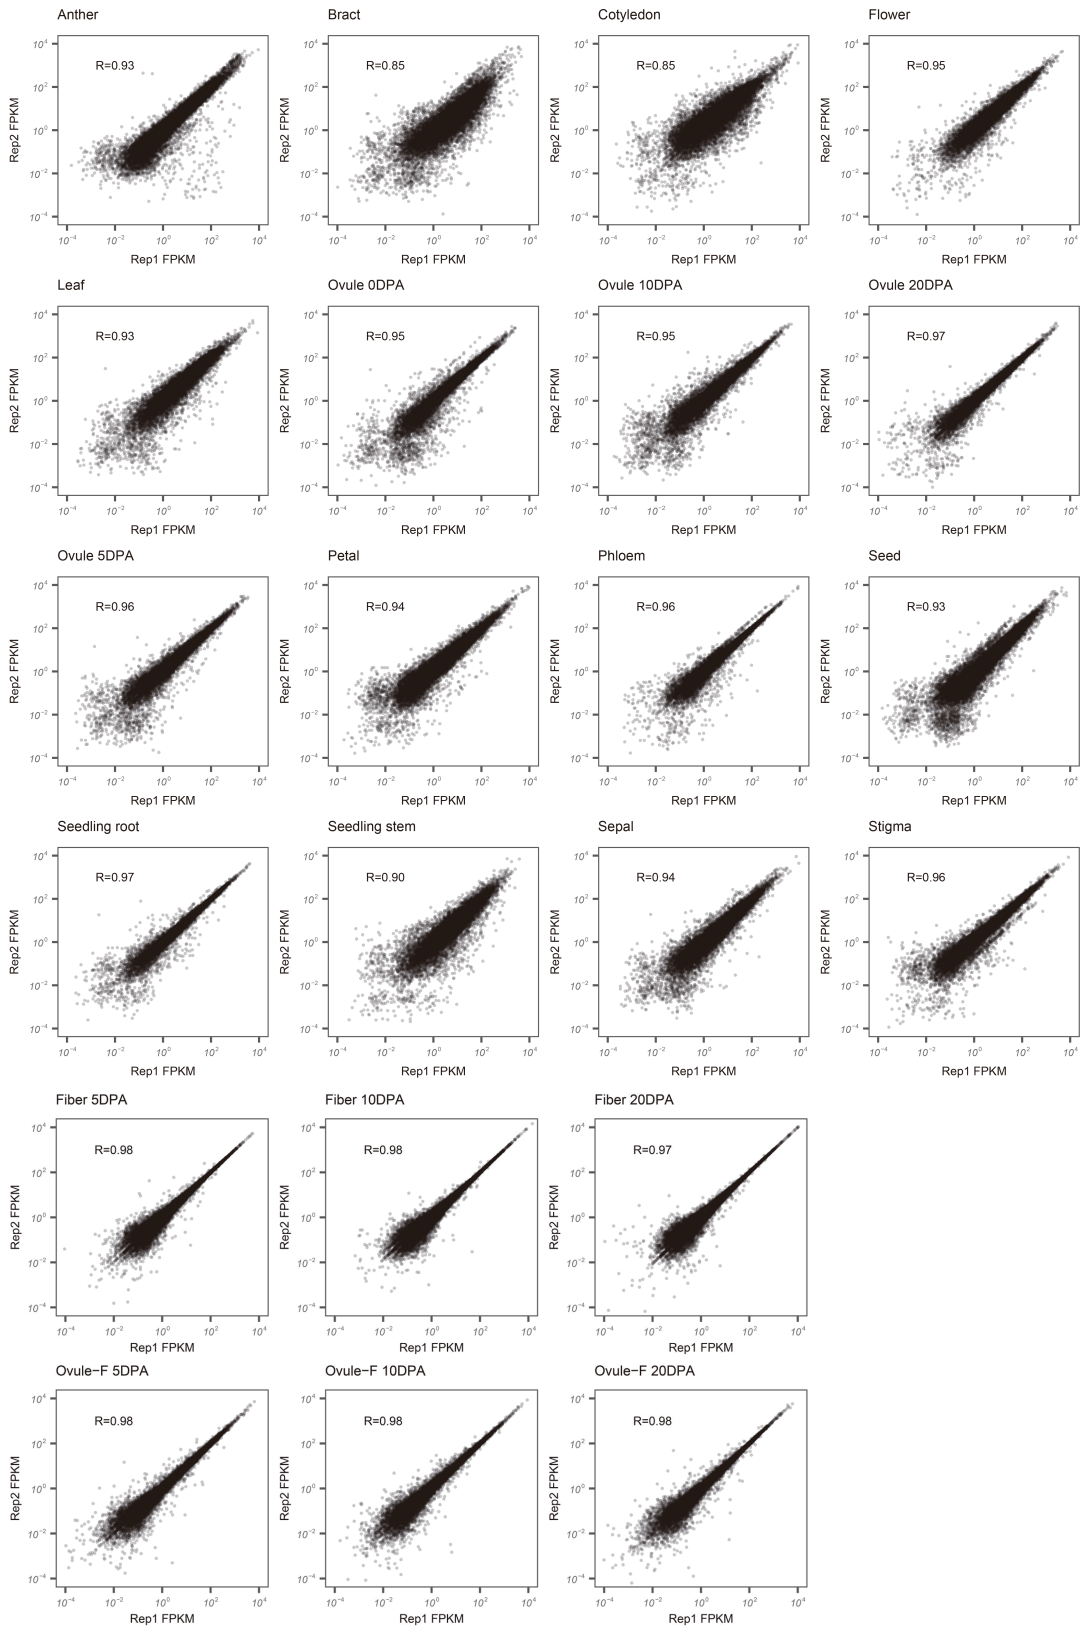

**Supplementary Figure 4. Correlations of gene expression between replicated experiments for 22 tissues.** The Pearson's correlation coefficients of the gene expression for two biological replicates are shown. Source data are provided as a Source Data file.

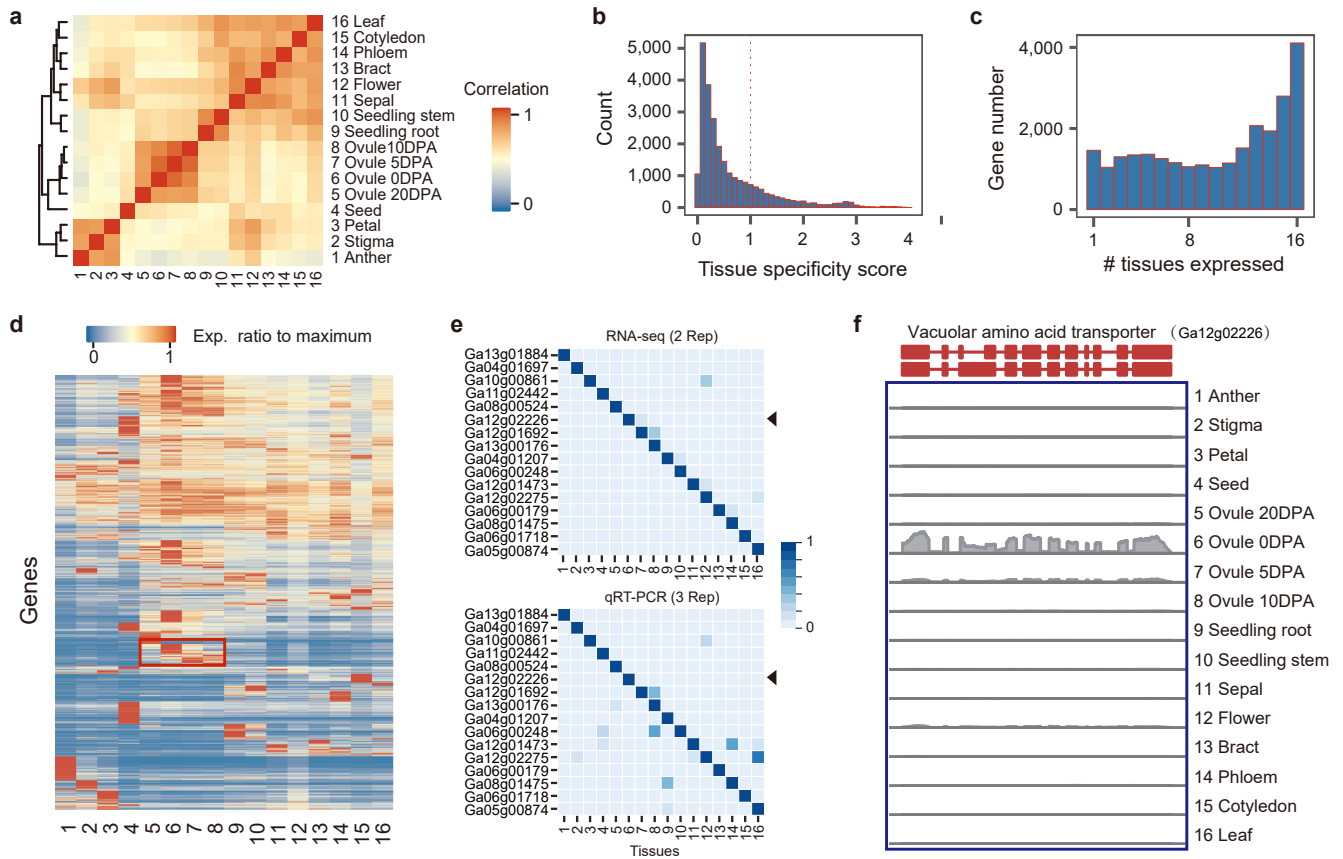

**Supplementary Figure 5. Gene expression dynamics across 16 tissues in *G. arboreum*.** (a) Hierarchical clustering of gene expression correlation across 16 tissues. The color scale 0-1 represents Spearman's correlation coefficients. The numbers 1-16 are abbreviations for the 16 tissues. (b) Distribution of the tissue specificity scores of genes. The dashed line indicates the threshold for defining tissue-specific genes with score  $\geq 1$ . (c) The number of genes expressed in specific number (from 1-16) of tissues. (d) Relative gene expression profile. The gene per row is normalized to its maximum value in 16 tissues. (e) Comparison of RNA-seq quantification (top) and qPCR (bottom) of 16 representative tissue-specific genes in 16 tissues. For each gene, the expression values in 16 tissues were normalized to its maximum value. (f) ssRNA-seq signal tracks for a tissue-specific gene. The source data underlying Supplementary Figure 5a and 5e are provided as a Source Data file.



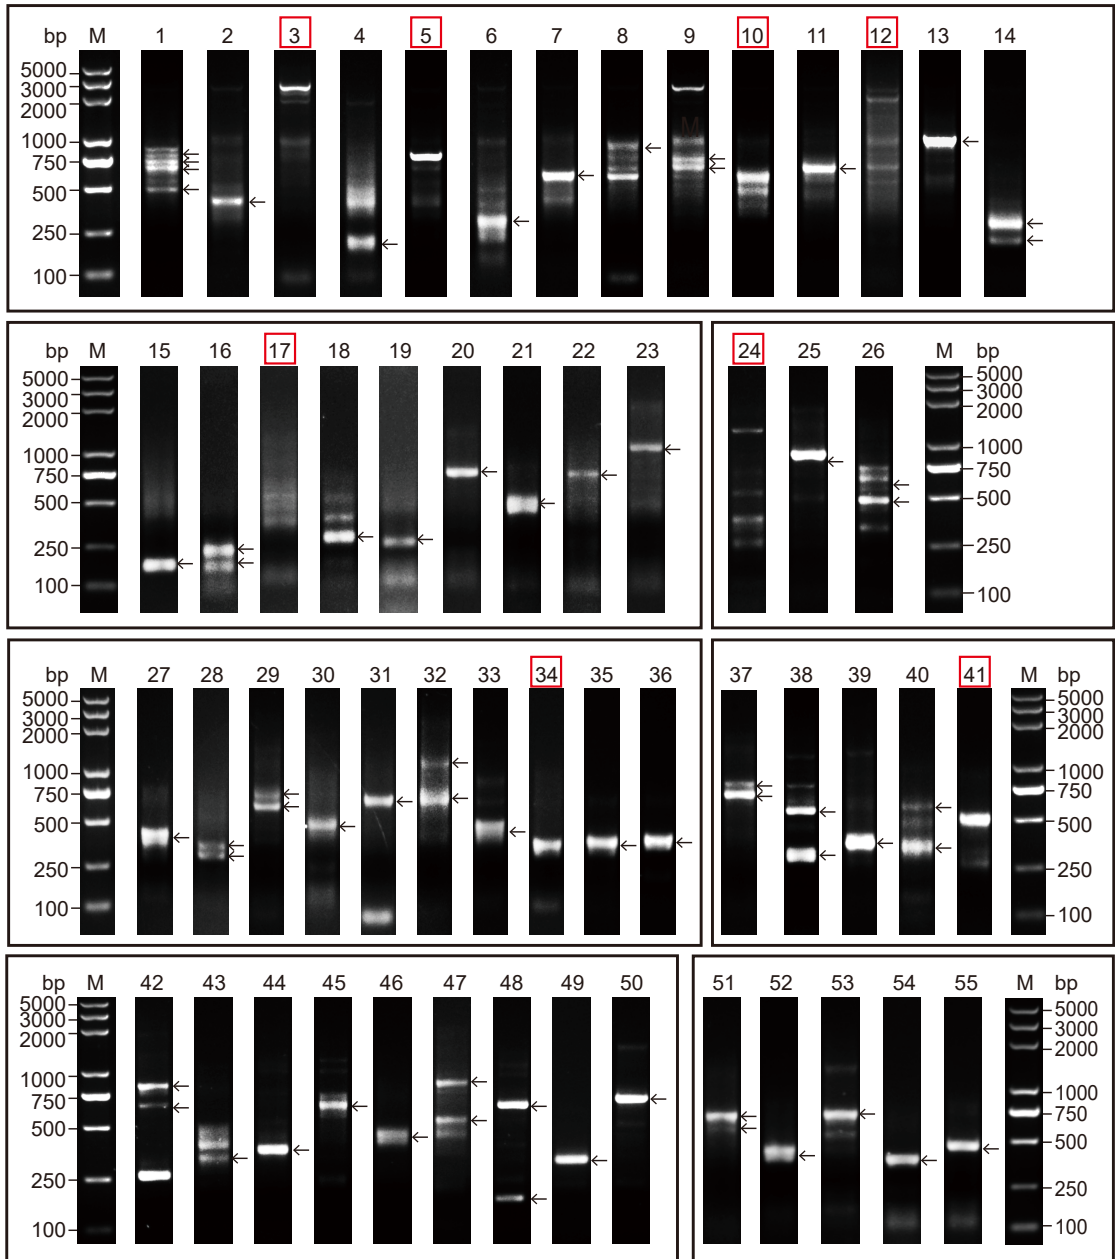

**Supplementary Figure 7. 5'RACE-PCR validation of randomly selected TSSs.** The expected bands are indicated by arrows and the lanes with putative PCR failure and unspecific bands are marked with red rectangle boxes. The gene and primer information is provided in Supplementary Data 14. Source data are provided as a Source Data file.



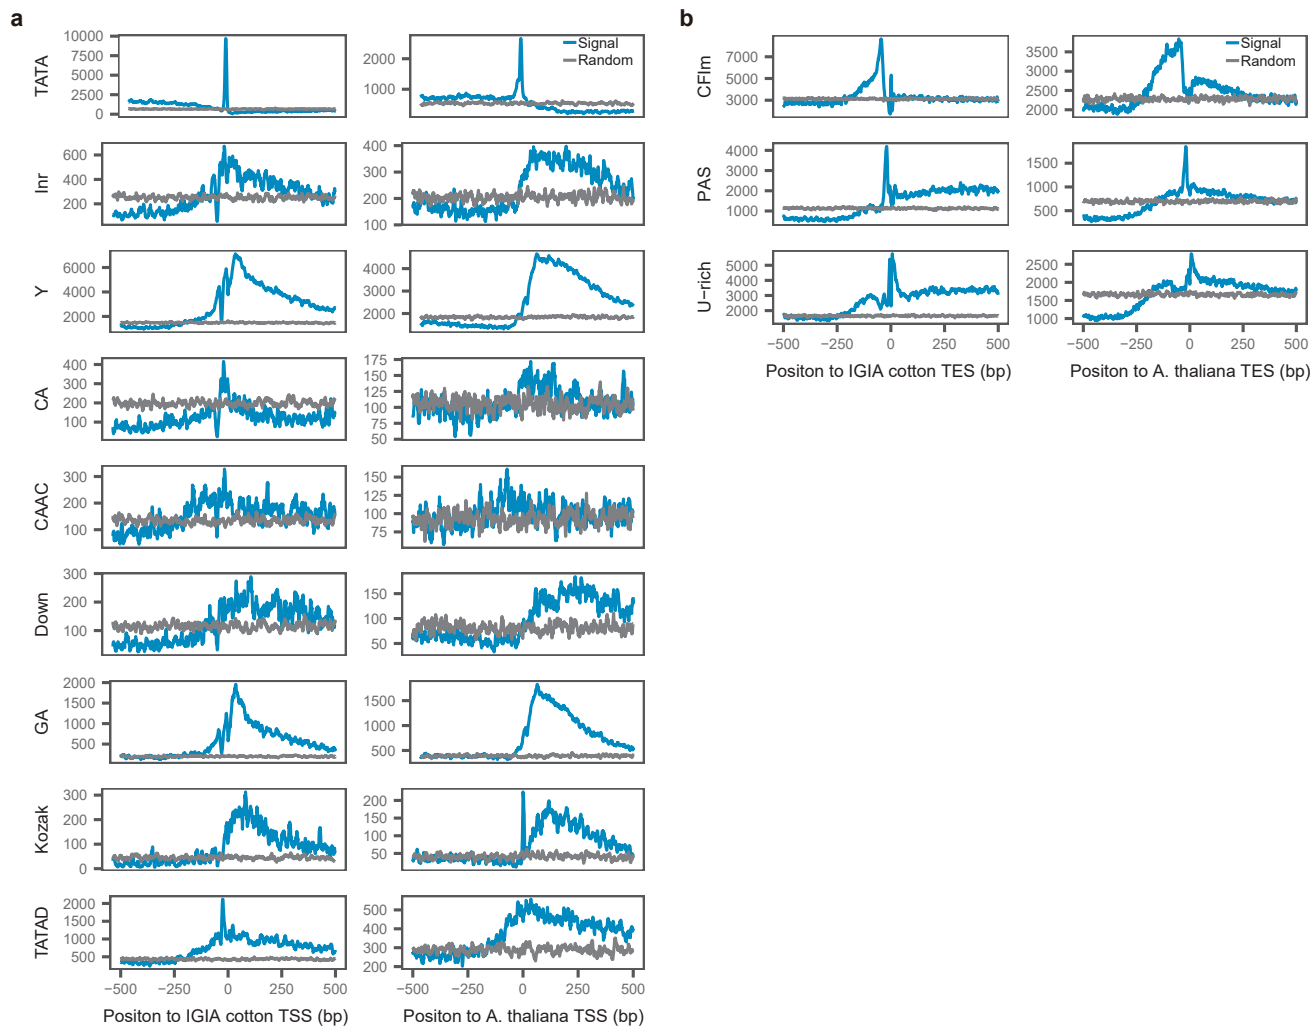

**Supplementary Figure 8. The sequence features around TSSs and TESs.** (a) The known TSS features include CA, CAAC, Down, GA, lnr, Kozak, TATA, TATAD, and Y motifs. (b) The known TES features include CFIm, PAS and U-rich motifs. The signals in random controls are shown with gray lines. Source data are provided as a Source Data file.

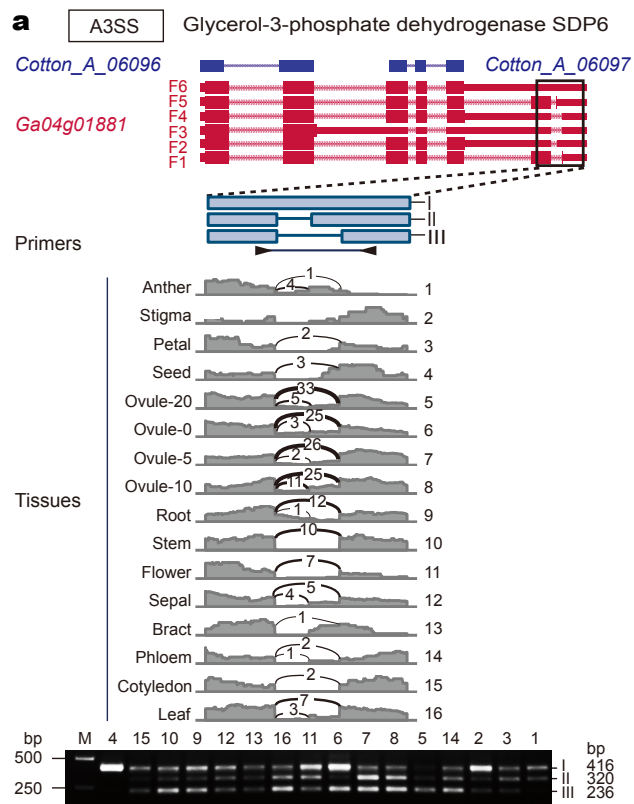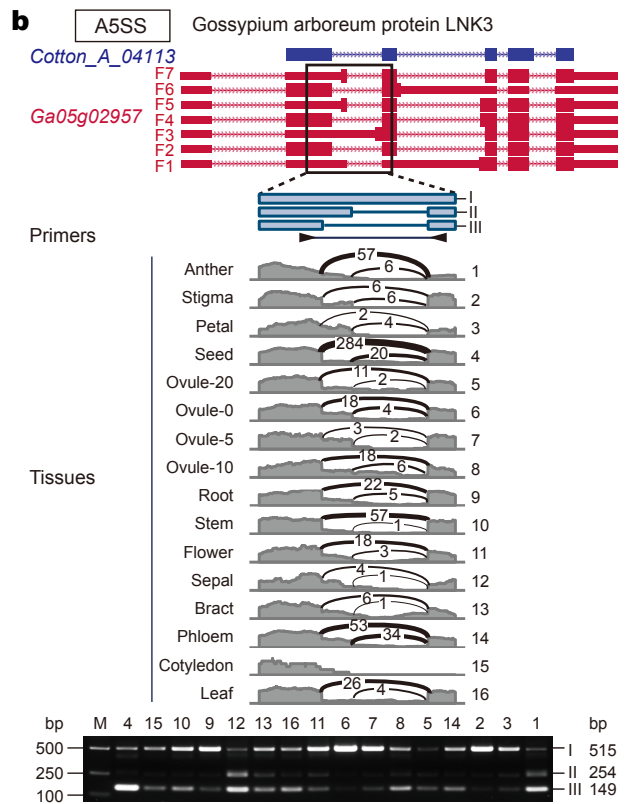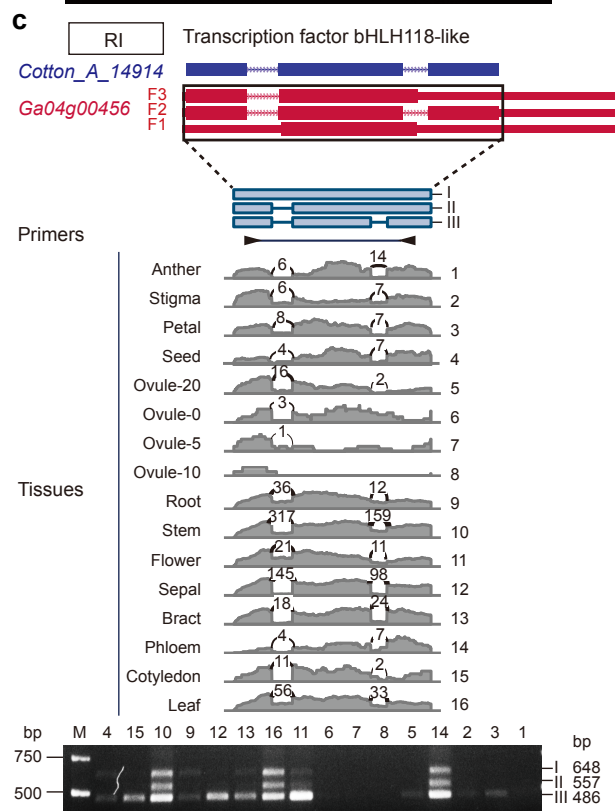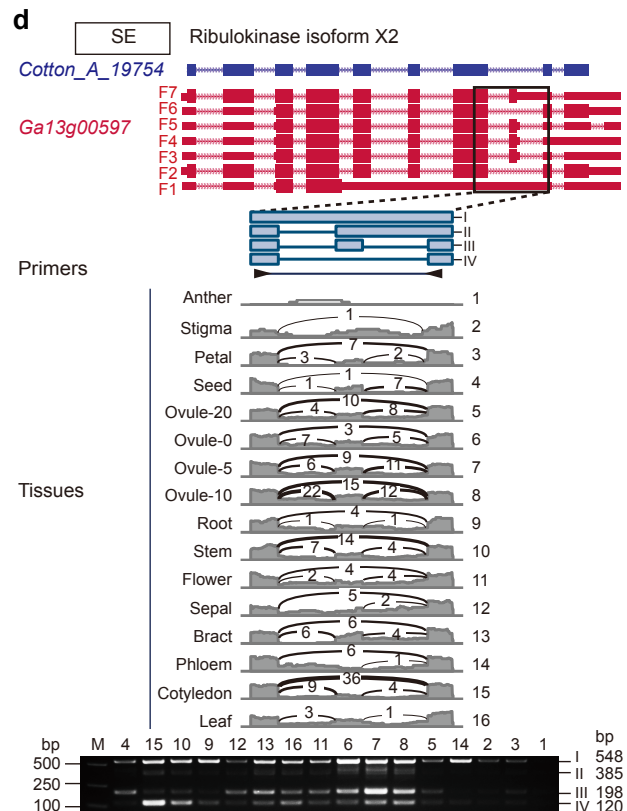

**Supplementary Figure 9. RT-PCR validated AS events.** The Cottongen annotation, IGIA isoforms, and the ssRNA-seq signals across 16 tissues are shown. The examples of A3SS, A5SS, RI, and SE are shown in (a) - (d), respectively. Source data are provided as a Source Data file.

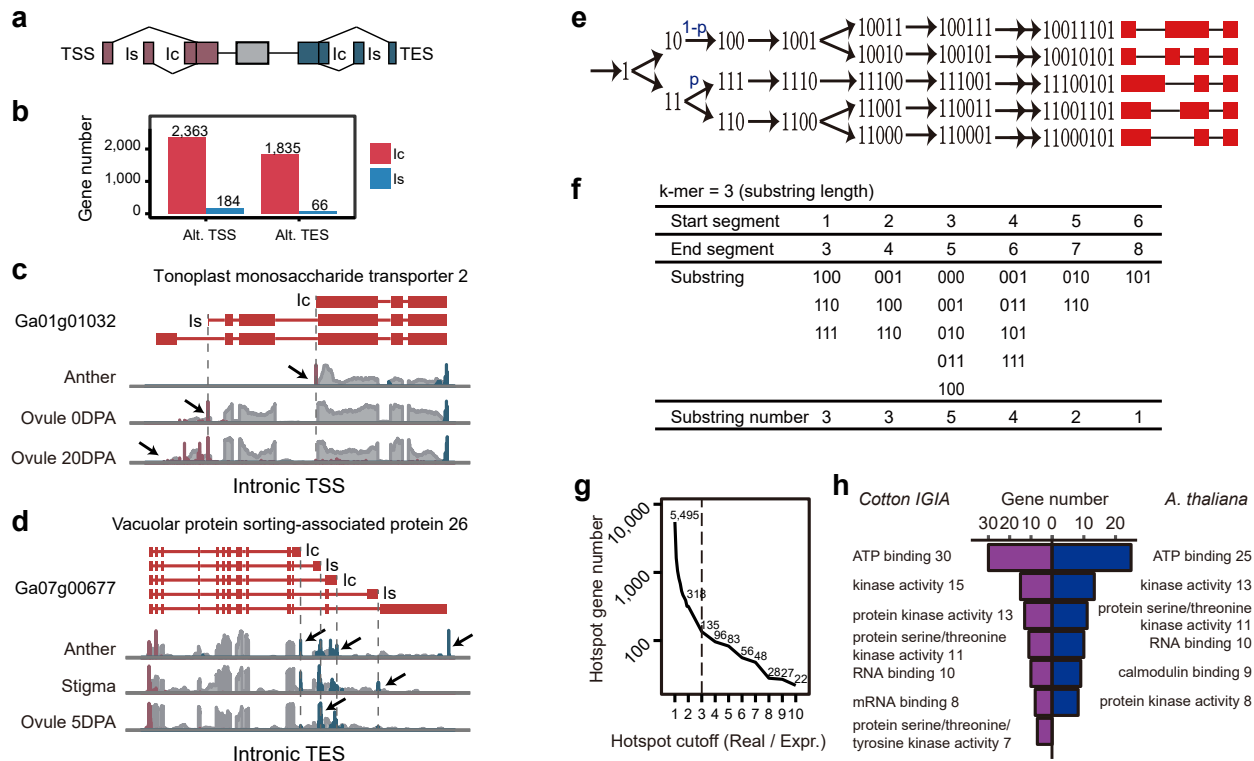

**Supplementary Figure 10. Identification of the genes with intronic TSS/ TES switching and AS hotspots.** (a) Schematic illustration of intronic TSS/ TES switching events. Is: intronic TSS/ TES in skipped terminal exon; Ic: intronic TSS/ TES in composite terminal exon. (b) Overview of intronic TSS and TES changes in cotton genome. (c) A gene example of intronic TSS change. (d) A gene example of intronic TES change. (e) Computational model for identifying AS hotspots. (f) A statistical example with k-mer = 3 based on the model. (g) The results of identified hotspots at different cutoffs. Dashed line marks the cutoff used in this study. (h) GO term annotations for genes with AS hotspots in *G. arboreum* and *A. thaliana*. The source data underlying Supplementary Figure 10b and 10g are provided as a Source Data file.

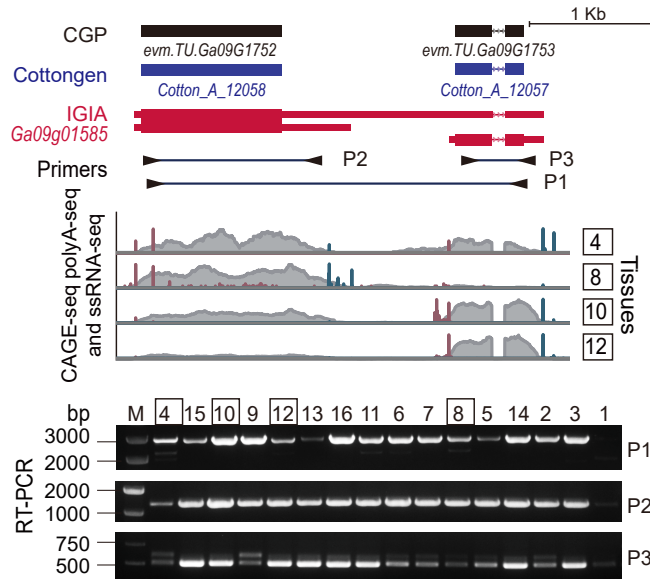

**Supplementary Figure 11. Polycistron example with two CDSs.** The CGP, Cottongen, and IGIA annotations, CAGE-seq and PolyA-seq signals from mixed tissues, and ssRNA-seq signals in four tissues are shown. RT-PCR validations were performed in 16 tissues. The three probes are indicated below the IGIA isoforms. Source data are provided as a Source Data file.

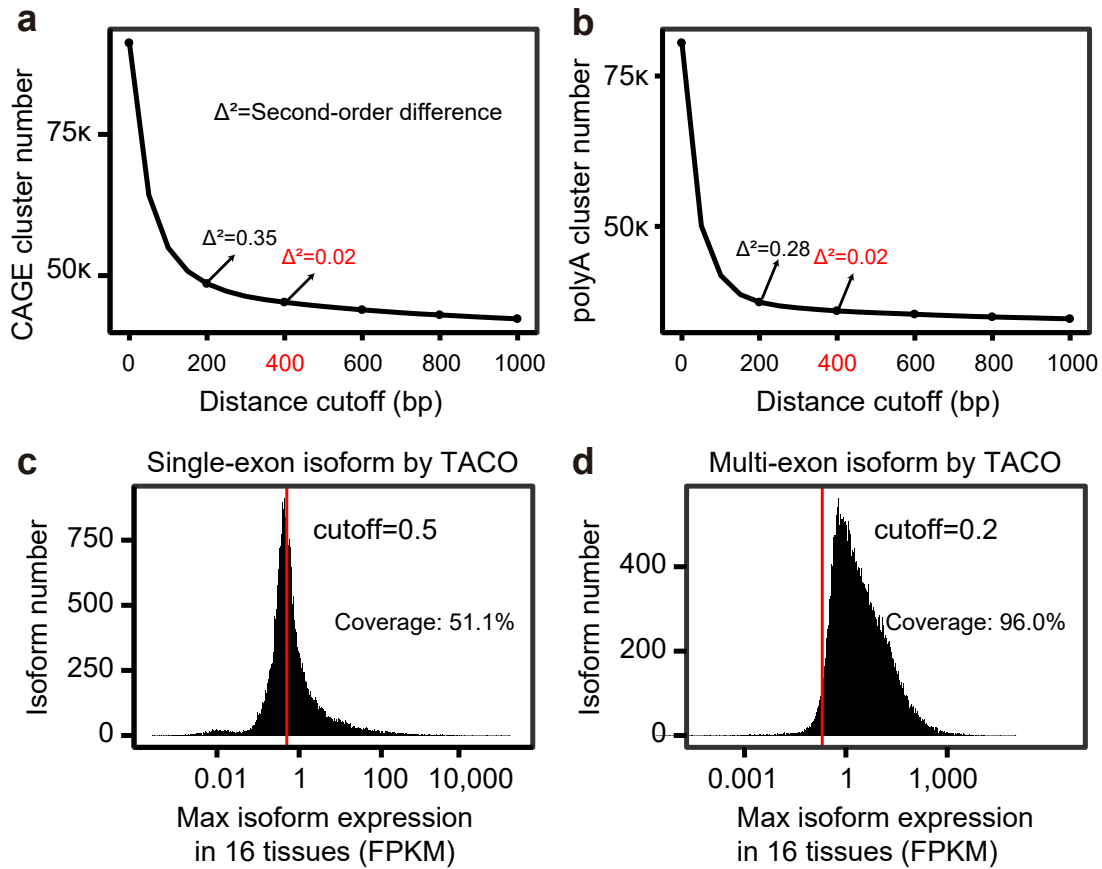

**Supplementary Figure 12. The predicted number of CAGE/PolyA cluster and single/multi-exon isoform analysis with different cutoff values.** The cutoff values used in this study are highlighted in red. (a) The predicted number of CAGE clusters using different distance cutoff values between any two CAGE clusters for one gene. (b) The predicted number of polyA clusters using different distance cutoff values between any two polyA clusters for one gene. (c) The predicted isoform number using different FPKM cutoff values for single-exon isoforms. (d) The predicted isoform number using different FPKM cutoff values for multi-exon isoforms. Source data are provided as a Source Data file.

**Supplementary Table 1. Statistics of Pacbio sequencing data**

|        | Cells | Bases<br>(Gb) | Reads     | Mean<br>read length | ROIs<br>(Reads Of Insert) | ROI length | ROI quality | Mean No.<br>of passes |
|--------|-------|---------------|-----------|---------------------|---------------------------|------------|-------------|-----------------------|
| <1 Kb  | 14    | 25.95         | 1,362,180 | 19,051              | 1,015,633                 | 1048       | 0.9708      | 14.73                 |
| 1-2 Kb | 16    | 22.42         | 1,236,185 | 17,458              | 830,078                   | 1854       | 0.9737      | 10.86                 |
| 2-3 Kb | 20    | 29.03         | 1,621,526 | 17,420              | 995,478                   | 2847       | 0.9724      | 9.46                  |
| >3 Kb  | 14    | 15.51         | 984,806   | 15,183              | 491,525                   | 4174       | 0.9723      | 6.83                  |
| Total  | 64    | 92.91         | 5,204,697 | -                   | 3,332,714                 | -          | -           | -                     |

**Supplementary Table 2. Statistics of CAGE-seq sequencing data**

| Tissue        | Raw reads   | Clean reads | rRNA reads | Mapped      | Uniquely mapped | Cluster number |
|---------------|-------------|-------------|------------|-------------|-----------------|----------------|
| Anther        | 67,986,394  | 36,954,976  | 437,157    | 32,892,643  | 26,799,718      | 21,153         |
| Bract         | 86,379,263  | 86,379,263  | 876,467    | 75,226,081  | 39,810,471      | 31,192         |
| Cotyledon     | 77,842,989  | 77,842,989  | 893,128    | 66,424,595  | 28,650,391      | 24,832         |
| Flower        | 69,041,744  | 69,028,937  | 346,573    | 56,667,119  | 30,473,749      | 30,513         |
| Ovule-0DPA    | 95,613,710  | 95,613,710  | 298,966    | 89,142,443  | 43,095,434      | 33,003         |
| Ovule-10DPA   | 54,671,800  | 42,171,951  | 269,070    | 38,204,041  | 26,986,197      | 26,931         |
| Ovule-20DPA   | 107,794,533 | 107,794,533 | 637,756    | 95,921,011  | 40,222,640      | 26,701         |
| Ovule-5DPA    | 119,107,602 | 119,107,602 | 272,053    | 110,252,058 | 48,597,679      | 32,552         |
| Petal         | 108,591,308 | 108,591,308 | 680,126    | 96,700,752  | 44,632,322      | 29,108         |
| Leaf          | 98,225,366  | 98,225,366  | 1,249,080  | 86,886,387  | 40,588,295      | 30,949         |
| Phloem        | 108,496,076 | 108,496,076 | 701,755    | 94,943,824  | 46,372,950      | 28,872         |
| Seed          | 86,930,690  | 86,930,690  | 1,198,475  | 72,225,713  | 30,532,876      | 16,619         |
| Seedling root | 107,978,328 | 107,978,328 | 914,823    | 96,198,027  | 47,691,930      | 34,348         |
| Seedling stem | 61,043,305  | 47,413,819  | 200,705    | 44,187,726  | 31,069,209      | 29,788         |
| Sepal         | 100,728,978 | 100,728,978 | 486,990    | 91,468,605  | 37,947,509      | 27,827         |
| Stigma        | 70,634,058  | 36,457,600  | 154,775    | 33,683,632  | 25,898,145      | 24,453         |

**Supplementary Table 3. Statistics of PolyA-seq sequencing data**

| Tissue        | Raw reads   | Clean reads | rRNA reads | Mapped     | Uniquely mapped | Cluster number |
|---------------|-------------|-------------|------------|------------|-----------------|----------------|
| Anther        | 123,005,751 | 87,775,785  | 363,387    | 71,999,887 | 25,591,654      | 15,224         |
| Bract         | 184,704,557 | 57,786,252  | 24,033     | 42,729,756 | 9,615,654       | 21,241         |
| Cotyledon     | 282,743,578 | 83,695,711  | 95,906     | 66,553,035 | 14,114,722      | 22,061         |
| Flower        | 171,425,480 | 90,316,208  | 16,576     | 71,190,380 | 19,840,848      | 27,508         |
| Ovule-0DPA    | 141,641,299 | 35,238,154  | 15,526     | 27,955,645 | 10,778,543      | 24,204         |
| Ovule-10DPA   | 145,352,360 | 76,277,166  | 24,275     | 60,815,956 | 12,703,181      | 22,651         |
| Ovule-20DPA   | 229,187,840 | 60,585,724  | 43,442     | 45,573,537 | 13,770,498      | 18,620         |
| Ovule-5DPA    | 130,368,960 | 45,152,387  | 16,717     | 38,052,614 | 14,598,934      | 22,402         |
| Petal         | 135,287,380 | 72,909,716  | 17,300     | 61,835,391 | 25,437,477      | 21,732         |
| Leaf          | 150,513,065 | 52,878,406  | 7316       | 37,785,265 | 10,951,223      | 24,590         |
| Phloem        | 155,611,731 | 54,198,293  | 32,057     | 42,549,704 | 17,559,072      | 24,625         |
| Seed          | 239,639,343 | 87,897,152  | 193,379    | 64,118,269 | 13,854,251      | 16,566         |
| Seedling root | 150,595,760 | 56,655,067  | 70,326     | 40,916,740 | 9,584,292       | 24,168         |
| Seedling stem | 205,974,889 | 96,135,263  | 143,407    | 74,421,566 | 13,947,537      | 26,432         |
| Sepal         | 139,910,466 | 68,878,692  | 11,017     | 51,947,077 | 10,573,125      | 24,188         |
| Stigma        | 132,752,994 | 74,304,029  | 45,136     | 62,320,698 | 21,287,094      | 19,186         |



**Supplementary Table 4. Genomes used in this study**

| Species                | URL                                                                                     | Version                                |
|------------------------|-----------------------------------------------------------------------------------------|----------------------------------------|
| <i>A. thaliana</i>     | <a href="https://www.arabidopsis.org">https://www.arabidopsis.org</a>                   | Araport11                              |
| <i>O. sativa</i>       | <a href="http://rice.plantbiology.msu.edu">http://rice.plantbiology.msu.edu</a>         | MSU 7.0                                |
| <i>D. melanogaster</i> | <a href="https://www.ncbi.nlm.nih.gov/genome/">https://www.ncbi.nlm.nih.gov/genome/</a> | GCF_000001215.4_Release_6_plus_ISO1_MT |
| <i>H. sapiens</i>      | <a href="https://www.ncbi.nlm.nih.gov/genome/">https://www.ncbi.nlm.nih.gov/genome/</a> | GCF_000001405.37_GRCh38.p11            |
| <i>M. musculus</i>     | <a href="https://www.ncbi.nlm.nih.gov/genome/">https://www.ncbi.nlm.nih.gov/genome/</a> | GCF_000001635.25_GRCm38.p5             |
| <i>G. raimondii</i>    | <a href="https://phytozome.jgi.doe.gov">https://phytozome.jgi.doe.gov</a>               | Gossypium raimondii v2.1               |
| <i>G. hirsutum</i>     | <a href="https://phytozome.jgi.doe.gov">https://phytozome.jgi.doe.gov</a>               | Gossypium hirsutum v1.1                |

**Supplementary Table 5. Counts of SNPs and GWAS sites in different regulatory regions**

| Element | Location        | SNPs    | SNPs per kb | GWAS | GWAS* |
|---------|-----------------|---------|-------------|------|-------|
| TSS     | Upstream 1kb    | 129,899 | 4.27        | 42   | 41    |
|         | First exon      | 24,049  | 2.00        | 47   | 29    |
|         | First intron    | 27,100  | 2.51        | 14   | 14    |
|         | Alt 5'UTR       | 6,090   | 1.78        | 5    | 4     |
| TES     | Downstream 1kb  | 113,948 | 3.78        | 47   | 42    |
|         | Last exon       | 37,117  | 2.12        | 88   | 54    |
|         | Last intron     | 26,687  | 2.79        | 21   | 21    |
|         | Alt 3'UTR       | 14,210  | 2.68        | 15   | 14    |
| ATG     | Upstream 50bp   | 3,621   | 2.04        | 7    | 7     |
|         | Start codon     | 76      | 0.71        | 0    | 0     |
|         | Downstream 50bp | 2,771   | 1.56        | 9    | 6     |
| TGA     | Upstream 50bp   | 2,849   | 1.66        | 7    | 4     |
|         | End codon       | 155     | 1.50        | 0    | 0     |
|         | Downstream 50bp | 3,658   | 2.14        | 6    | 6     |
| CS      | 3'SS (-50~+50)  | 23,642  | 1.63        | 51   | 39    |
|         | 5'SS (-50~+50)  | 23,585  | 1.63        | 54   | 37    |
| AS      | A3'SS           | 952     | 1.85        | 1    | 1     |
|         | A5'SS           | 964     | 1.76        | 0    | 0     |
|         | RI              | 10,358  | 2.02        | 17   | 10    |
|         | SE              | 4,199   | 2.29        | 1    | 1     |

\* GWAS sites after removal of those causing amino acid changes
